# Supplementary material
Source: PubMed Central journal article supplement (PMC3707534)
Supplement: supp_pp.113.218339_218339Supplemental_Data_NEW.pdf [file supp_pp.113.218339_218339Supplemental_Data_NEW.pdf]

# Supplemental Data

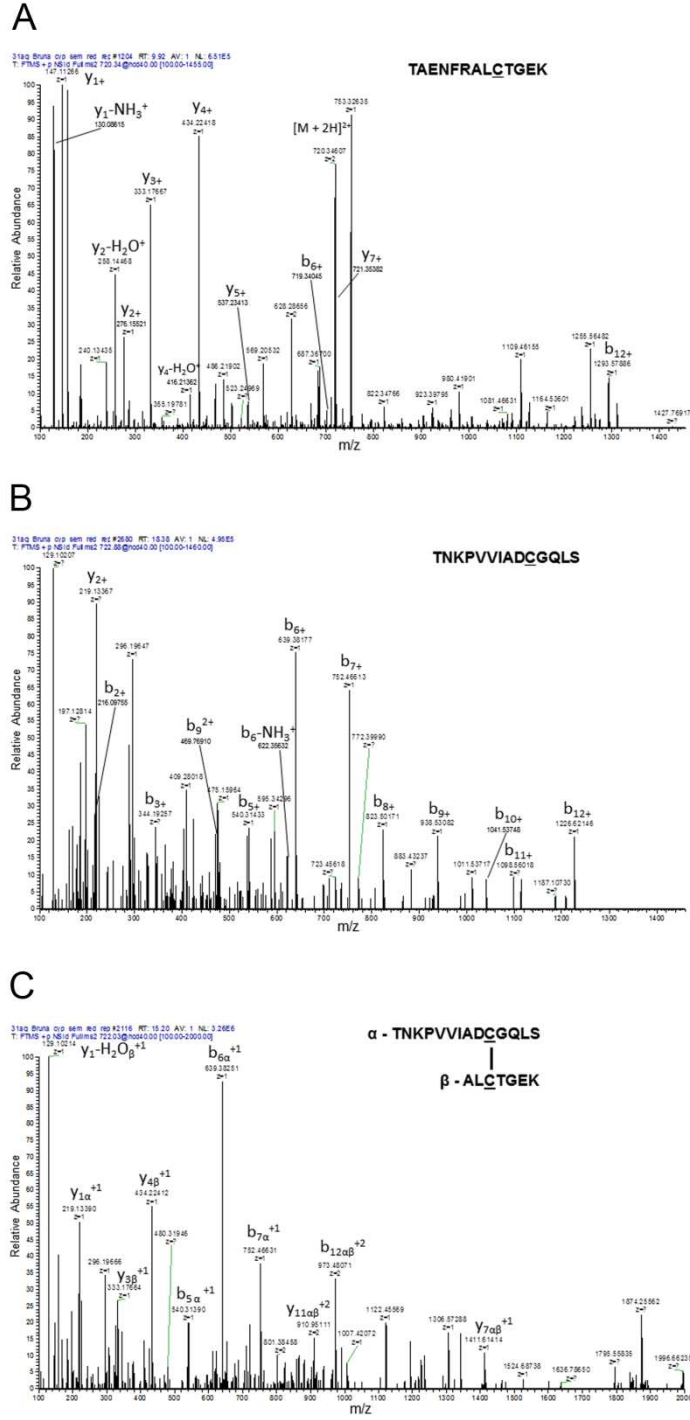

**Figure S1: The conserved cysteines, C40 and C168, form a disulfide bond.** Fragment ion spectra of reduced (A,B) and cross-linked (C) peptides. The MS/MS spectra were manually validated for b and y ion series for reduced peptides and for the  $\alpha$  and  $\beta$  chains of oxidized peptides.

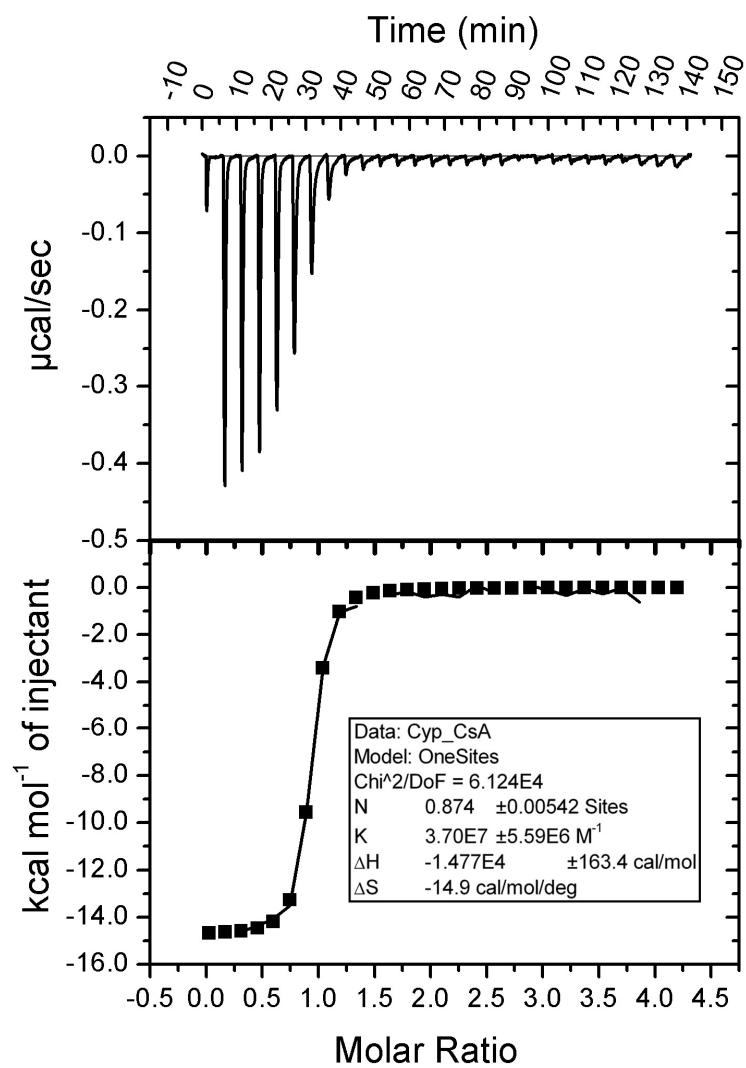

**Figure S2:** Interaction of CsCyp with CsA assessed by isothermal calorimetry, showing the raw injection heats (upper panel) and integrated data (lower panel) fit to a single site binding model.
